# Supplementary material
Source: PubMed Central journal article supplement (PMC8097382)
Supplement: EMBR-22-e51532-s002.pdf [file EMBR-22-e51532-s002.pdf]

## Expanded View Figures

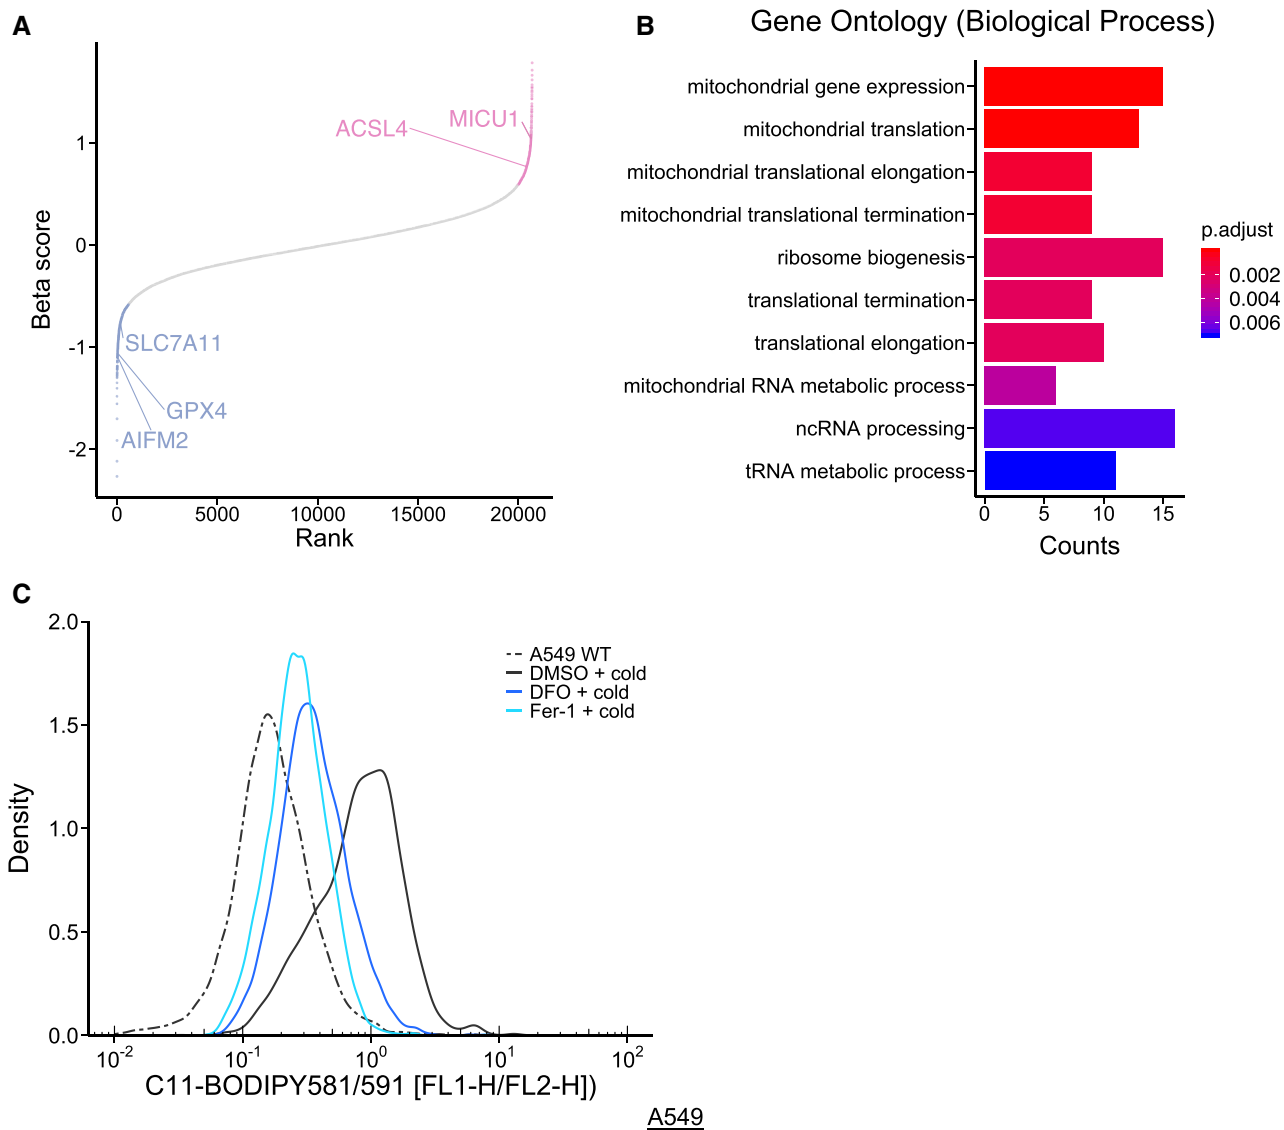

**Figure EV1. Analysis of screening, and mitochondria itself is involved in cold stress-induced ferroptosis, related to Fig 1.**

A Some genes are described as ferroptosis inducer or suppressors for the adequate evaluation of this screening. A well-known ferroptosis inducer, acyl-CoA synthetase long-chain family member 4 (ACSL4) and ferroptosis suppressors, ferroptosis suppressor 1 (FSP1 also known as AIFM2), glutathione peroxidase 4 (GPX4), and solute carrier family 7 member 11 (SLC7A11), are highlighted after analyzing the count data from CRISPR screening using the MAGeCK program. Red and blue genes are outside of the  $2 \times$  SD range and candidates of ferroptosis inducers and suppressors, respectively, which are enriched in MAGeCKFlute packages.

B Results of Gene Ontology (GO) analysis with biological process. After analysis of count data using MAGeCK, positive genes (cut-off of  $P < 0.01$ , see also Dataset EV1) were analyzed by GO analysis using clusterProfiler packages for R.

C Lipid peroxidation was measured by C11-BODIPY 581/591 after cold stress for 5 h. Representative density plot is presented as reported previously (Hattori et al, 2017). Deferoxamine (DFO, 200  $\mu$ M) and ferrostatin-1 (Fer-1, 1  $\mu$ M) were pretreated for 30 min before cold stress.

**Figure EV2. MCU deficiency does NOT suppress cold stress-induced ferroptosis, related to Figures 1 and 2.**

- A Immunoblots of endogenous MICU1 or MCU signals after siRNAs transfection in the WT A549 cells.
- B LDH release was measured after cold stress for 24 h. Data are presented as mean  $\pm$  SEM;  $n = 4$  (B), biological replicates,  $**P < 0.01$ , n.s.: not significant, one-way ANOVA followed by Dunnett's test.
- C Components of the MCU complex (MCU, MCUR1, MCUB (CCDC109B), MICU1, MICU2, MICU3, and EMRE (SMDT1)) are highlighted in red in the RRA score plot calculated by the MAGECK program.
- D Immunoblots of endogenous MCU signals after Cas9/sgRNA lentivirus infection in the WT A549 cells.
- E LDH release was measured after cold stress for 24 h. Data are presented as mean  $\pm$  SEM;  $n = 3$ , biological replicates, n.s.: not significant, one-way ANOVA followed by Dunnett's test.
- F Immunoblots of endogenous MICU1 or MCU signals after siRNAs transfection in the WT A549 cells and MICU1-KO cells.
- G LDH release was measured after cold stress for 24 h. Data are presented as mean  $\pm$  SEM;  $n = 3$ , biological replicates,  $****P < 0.0001$ ,  $*P < 0.05$ , one-way ANOVA followed by Tukey's test.
- H Immunoblots of endogenous and overexpressing MCU signals after MCU-HA lentivirus infection in the WT A549 cells.
- I LDH release was measured after cold stress for 24 h. Data are presented as mean  $\pm$  SEM;  $n = 3$ , biological replicates, n.s.: not significant, unpaired t-test.
- J Schematic model for MICU1 and MCU expression and its effect on cell death induced by cold stress.
- K LDH release was measured after cold stress for 16 h. Data are presented as mean  $\pm$  SEM;  $n = 3$ , biological replicates, n.s.: not significant, one-way ANOVA followed by Dunnett's test.
- L MICU2 mRNA was quantified by RT-qPCR. Data are presented as mean  $\pm$  SEM;  $n = 3$ , biological replicates,  $****P < 0.0001$ , one-way ANOVA followed by Dunnett's test.

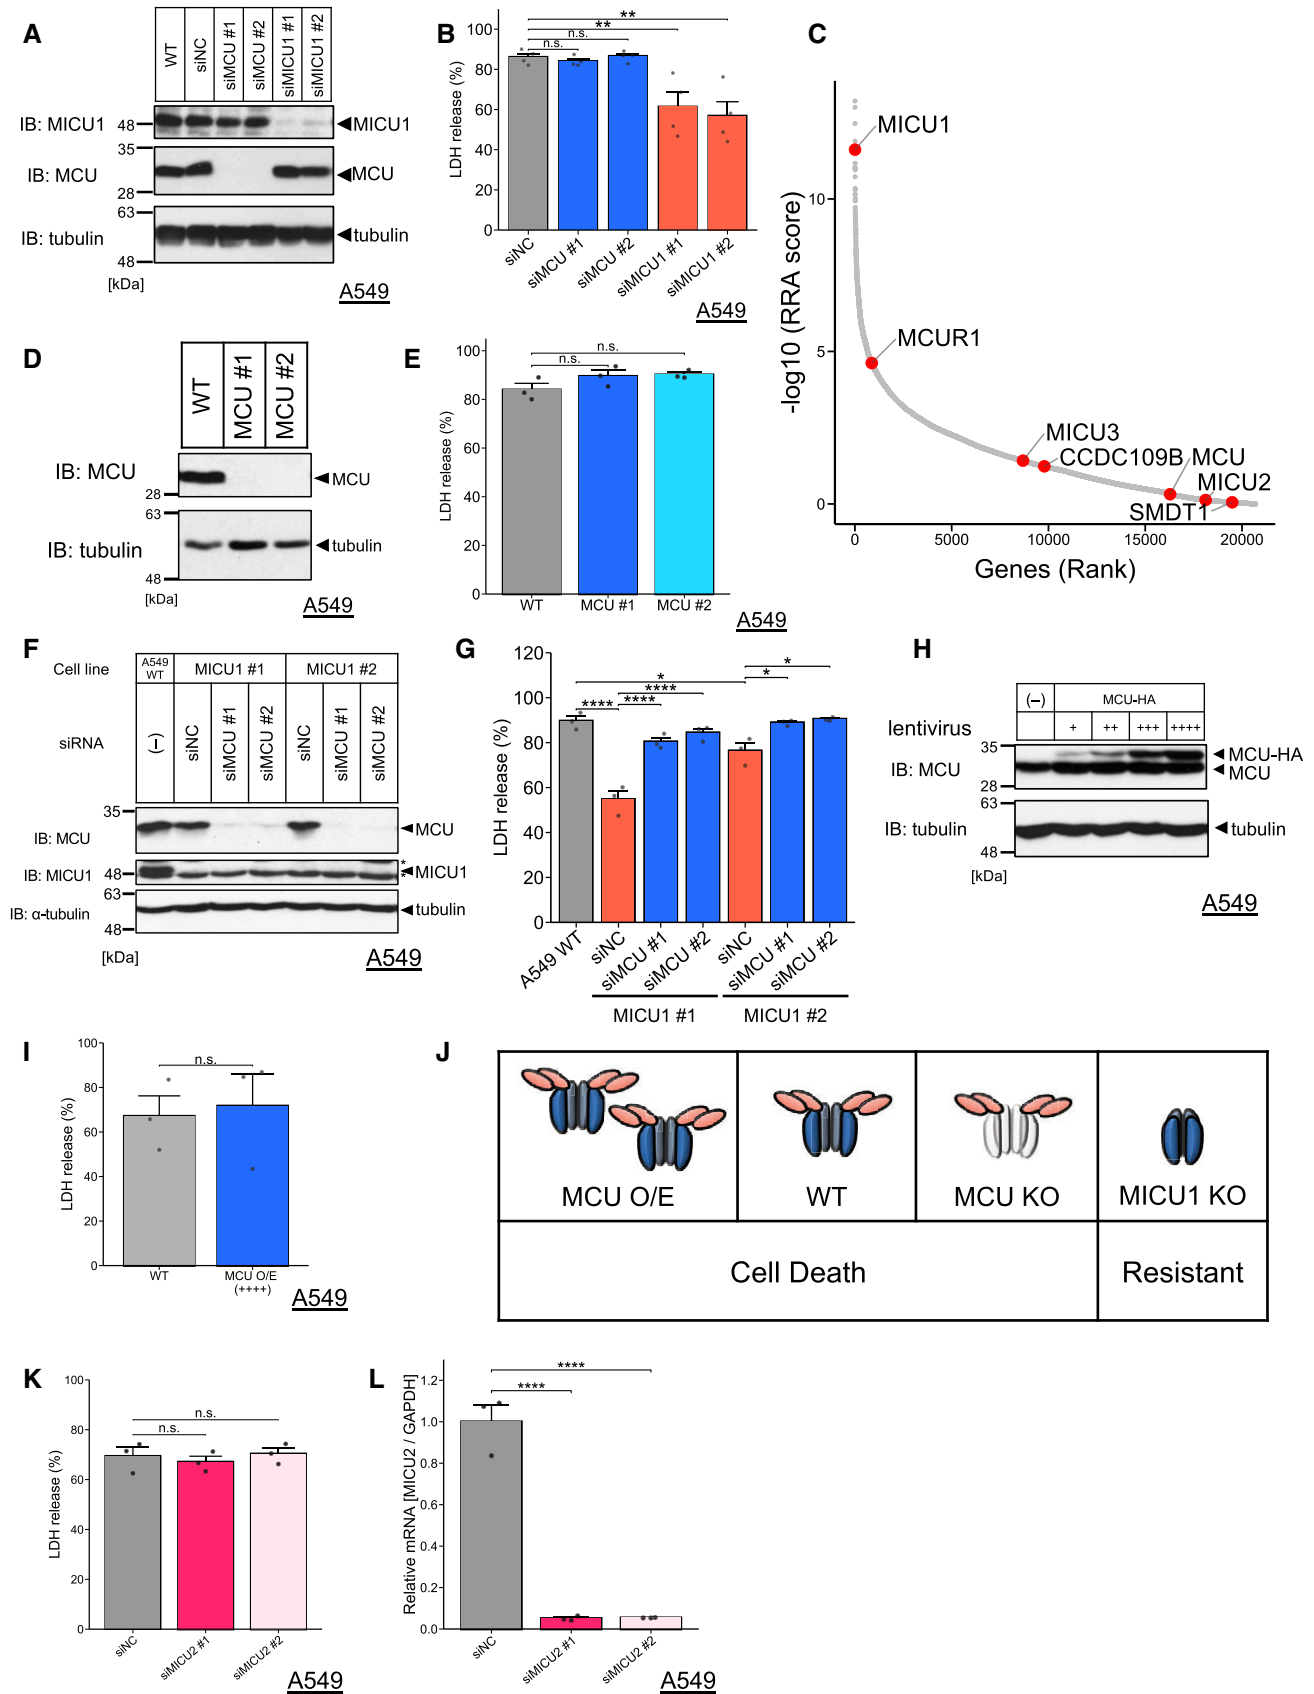

Figure EV2.

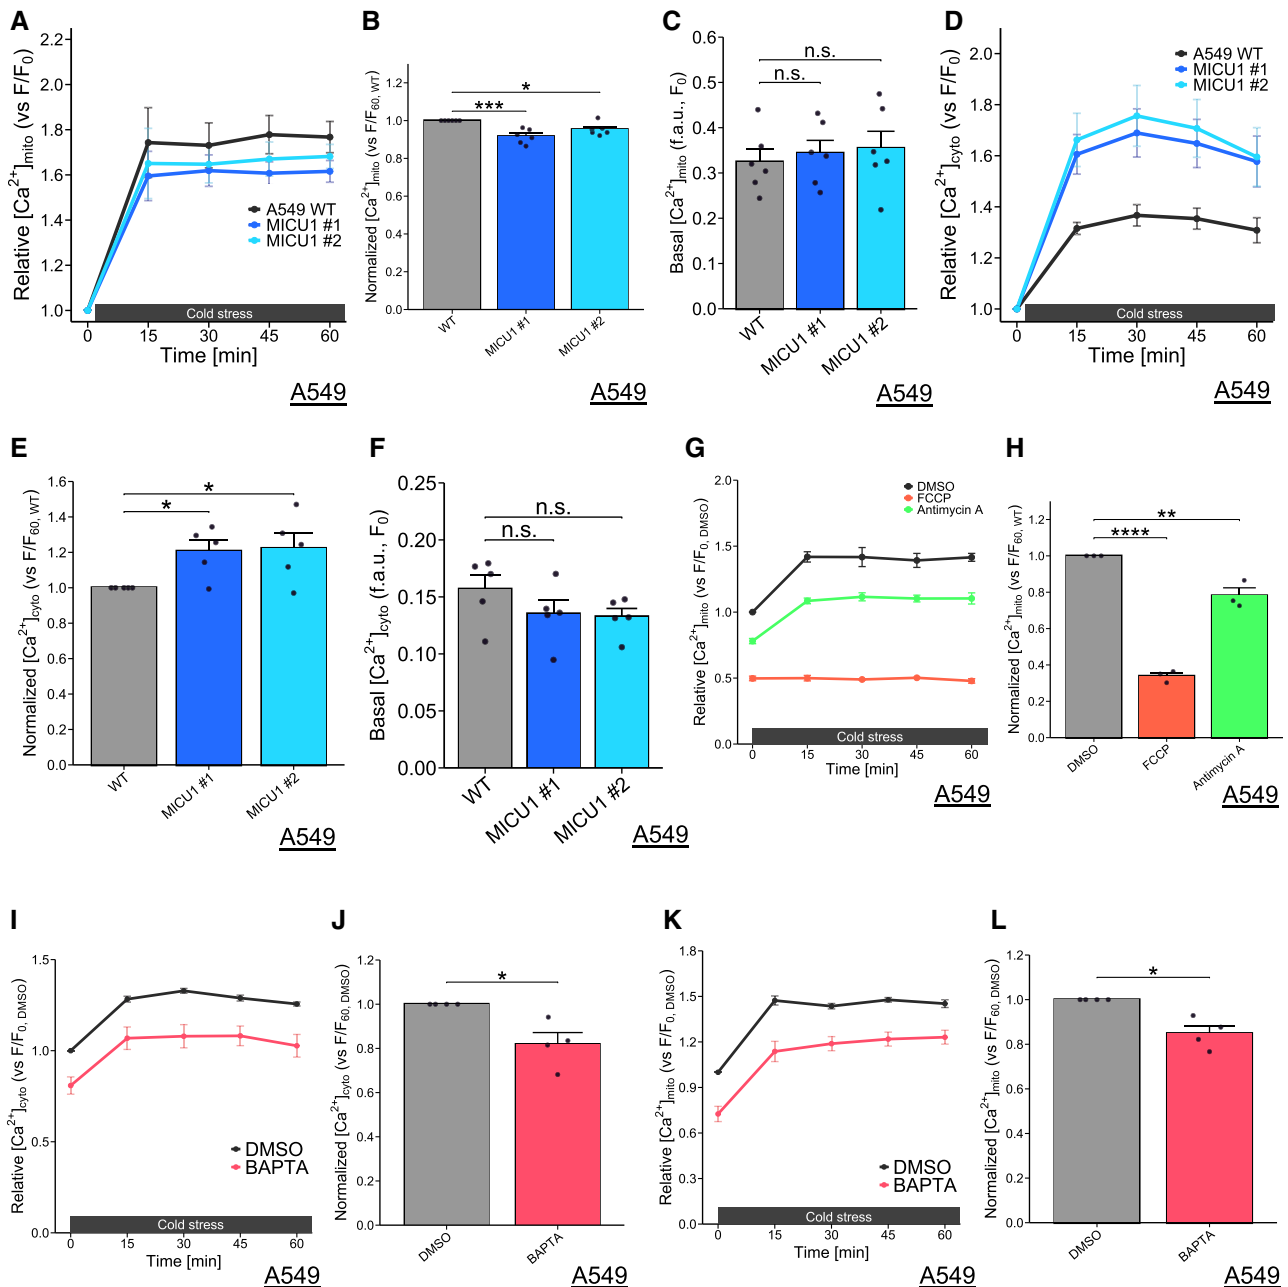

**Figure EV3. Cold stress-induced  $Ca^{2+}$  increase in matrix and cytosol, related to Figs 1–4.**

A-F Mitochondrial  $Ca^{2+}$  concentration (A-C) and cytosolic  $Ca^{2+}$  concentration (D-F) were monitored by Rhod-2 AM and Cal-520 AM, respectively, at every 15 min. Data (A, B, D and E) were normalized by data of before cold stress. The data before cold stress (C, F) and at 60 min (B, E) are presented as mean  $\pm$  SEM;  $n = 6$  (A-C), 5 (D-F), biological replicates, \*\*\* $P < 0.001$ , \* $P < 0.05$ , n.s.: not significant, by one-way ANOVA followed by Dunnett's multiple comparison test.

G, H Mitochondrial  $Ca^{2+}$  concentration was monitored by Rhod-2 AM at every 15 min. FCCP (200  $\mu\text{M}$ ) and antimycin A (50  $\mu\text{M}$ ) were used as pretreatments for 30 min. Data were normalized by data of DMSO before cold stress and the data at 60 min (H) are presented as mean  $\pm$  SEM;  $n = 3$ , biological replicates, \*\*\*\* $P < 0.0001$ , \*\* $P < 0.01$ , by one-way ANOVA followed by Dunnett's multiple comparison test.

I-L Cytosolic  $Ca^{2+}$  concentration (I-J) and mitochondrial  $Ca^{2+}$  concentration (K-L) were monitored by Cal-520 AM and Rhod-2 AM, respectively, at every 15 min. BAPTA-AM (10  $\mu\text{M}$ ) were used as pretreatments for 30 min. Data were normalized by data of DMSO before cold stress, and the data at 60 min (J, L) are presented as mean  $\pm$  SEM;  $n = 4$ , biological replicates, \* $P < 0.05$ , by paired T-test.

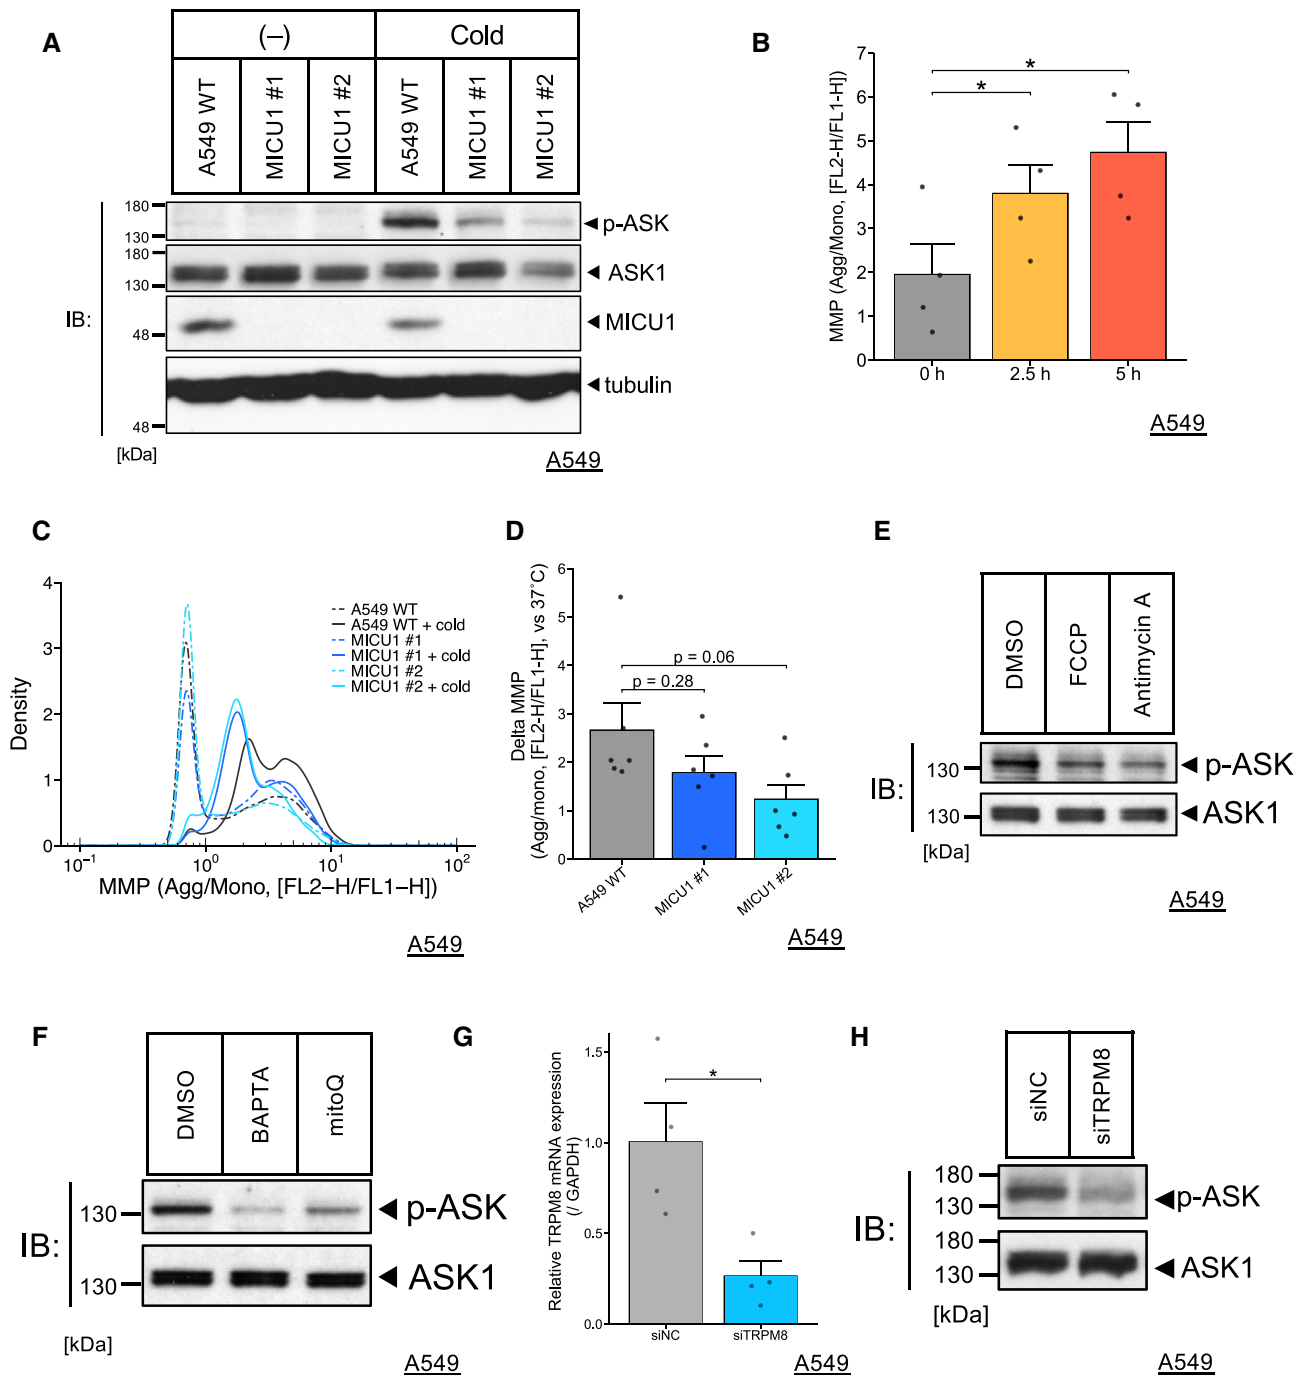

**Figure EV4. ASK1 activity in various conditions and hyperpolarization of MMP under cold stress, related to Figs 1, 3 and 4.**

- A Immunoblots of endogenous phospho-ASK signals after cold stress for 5 h of the WT A549 cells, cloned MICU1-KO cells.
- B Mitochondrial membrane potential (MMP) was measured by JC-1 after cold stress at the indicated time points. Quantification data for the WT A549 cells are presented as mean  $\pm$  SEM;  $n = 4$ , biological replicates,  $*P < 0.05$ , one-way ANOVA followed by William's test.
- C,D Mitochondrial membrane potential was measured by JC-1 after cold stress for 5 h. Representative (C) and quantification data (D) are represented as mean  $\pm$  SEM;  $n = 6$ , one-way ANOVA followed by Dunnett's test. Delta MMP was shown by the MMP of the WT A549 or MICU1 KO cells subtracted from that of each control condition.
- E,F Immunoblots of endogenous phospho-ASK signals after cold stress for 5 h of the WT A549 cells. Inhibitors (FCCP: 200  $\mu$ M, Antimycin A: 50  $\mu$ M, BAPTA: 10  $\mu$ M, mitoQ: 0.5  $\mu$ M) were used as pretreatments for 30 min.
- G TRPM8 mRNA was quantified by RT-qPCR. Data are presented as mean  $\pm$  SEM;  $n = 4$ ,  $*P < 0.05$ , unpaired t-test.
- H Immunoblots of endogenous phospho-ASK signals after cold stress for 5 h of the WT A549 cells or TRPM8-KD cells by siRNA transfection.

**Figure EV5. MICU1 can be one of potential targets for cold-induced cell death, but MICU1 and cytosolic Ca<sup>2+</sup> may not be involve in other ferroptotic cell death.**

- A LDH release was measured after DMSO or erastin (10  $\mu$ M) treatment with DMSO or BAPTA-AM (10  $\mu$ M) for 24 h. Data are presented as mean  $\pm$  SEM;  $n = 7$ , biological replicates, \*\*\*\* $P < 0.0001$ , n.s.: not significant, one-way ANOVA followed by Bonferroni's test.
- B,C Cell viability was measured after erastin treatment as indicated concentrations for 24 hours in A549 cells and MICU1 #1/#2 KO A549 cells or Cas9-HT-1080 cells and Cas9-HT-1080 cells infected with lentivirus containing sgRNA of MICU1 #1/#2. Data are presented as mean  $\pm$  SEM;  $n = 3$  biological replicates.
- D Immunoblots of MICU1 were present for knockout confirmation in Cas9-HT-1080 cells after lentivirus infection.
- E Relative mRNA expression of MICU1 in normal human tissue was normalized by GAPDH mRNA expression. Data was obtained from Refex database.
- F LDH release was measured after cold stress for 24 h in indicated cell lines. Data are presented as mean  $\pm$  SEM;  $n = 4$ , biological replicates, \*\* $P < 0.01$ , \* $P < 0.05$ , one-way ANOVA followed by Dunnett's test.
- G Immunoblots of MICU1 were present for knockdown confirmation in HepG2 cells after siRNA transfection.
- H LDH release was measured after cold stress for 24 h in indicated cell lines. Data are presented as mean  $\pm$  SEM;  $n = 3$ , biological replicates, \*\*\*\* $P < 0.0001$ , one-way ANOVA followed by Dunnett's test.
- I Immunoblots of MICU1 were present for knockdown confirmation in HEK293A cells after siRNA transfection.

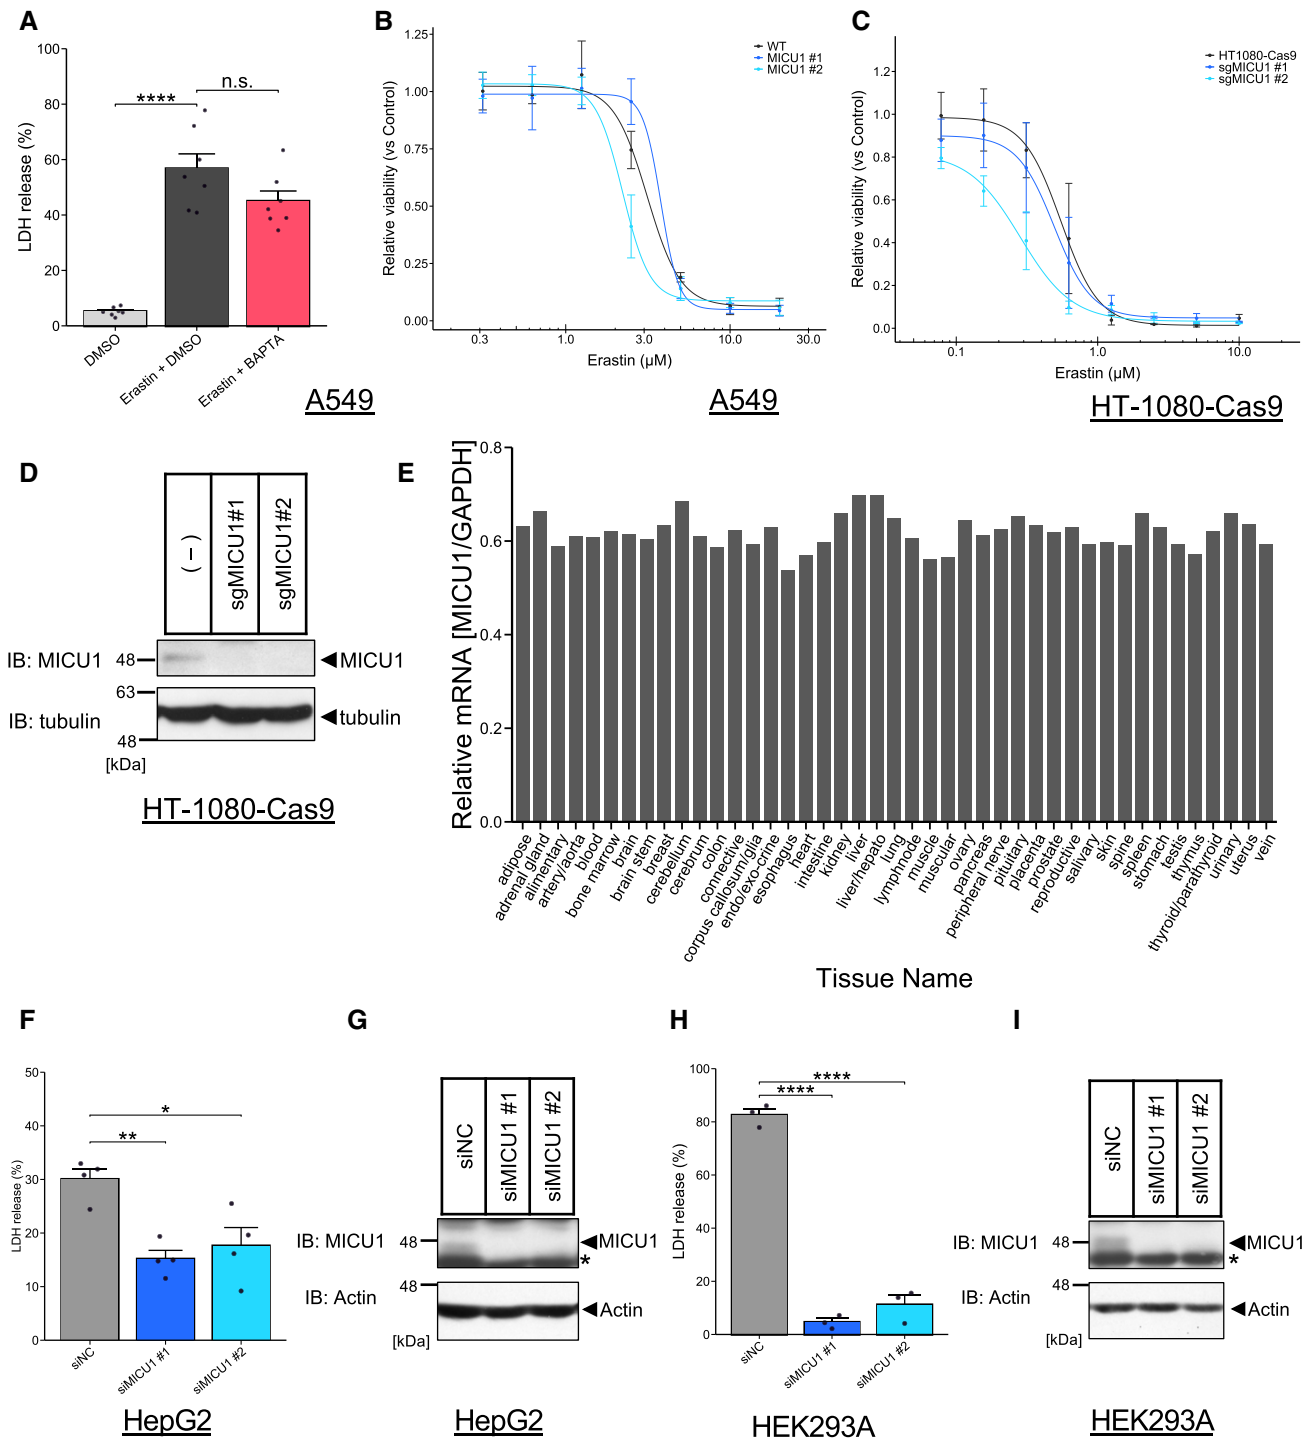

Figure EV5.
