# Supplementary material
Source: PubMed Central journal article supplement (PMC8097382)

## Appendix PDF contents

1. Appendix Figure legends (1 page)
2. Appendix Figure S1

## **Appendix Figure S1.**

(A) (left) Related to Methods, data of mitochondrial  $\text{Ca}^{2+}$  measurement with or without  $\text{Mn}^{2+}$  was shown in Appendix Figure 1A. Representative data was shown as mean  $\pm$  s.d.

(right) Temperatures changes were shown as mean  $\pm$  SEM; n = 3, biological replicates. Plate was put on ice (blue) or in the plate reader (orange).

(B) Related to Methods, data of  $\text{Fe}^{2+}$  measurement was shown in Appendix Figure 1B. Control was cultured at 37 °C, and cold was cultured under cold stress. Fe (II): 100 $\mu\text{M}$  and DFO: 100  $\mu\text{M}$ , deferoxamine were applied from 30 min before cold stress. Representative mean values of FACS analysis were shown.

# Appendix Figure S1

## A Related to Method, $[Ca^{2+}]_{mito}$ measurement

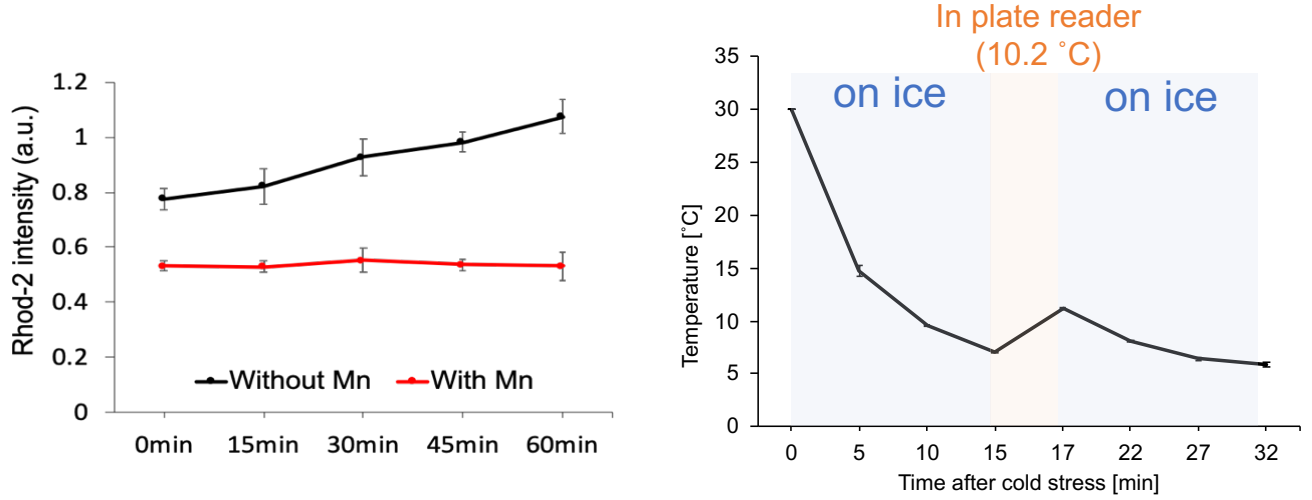

## B Related to $[Fe^{2+}]$ measurement

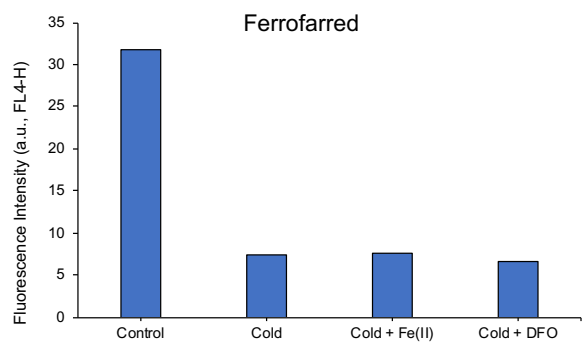

Supplement: EMBR-22-e51532-s007.pdf [file EMBR-22-e51532-s007.pdf]
