# Supplementary material
Source: PubMed Central journal article supplement (PMC8097382)

Fig.2B

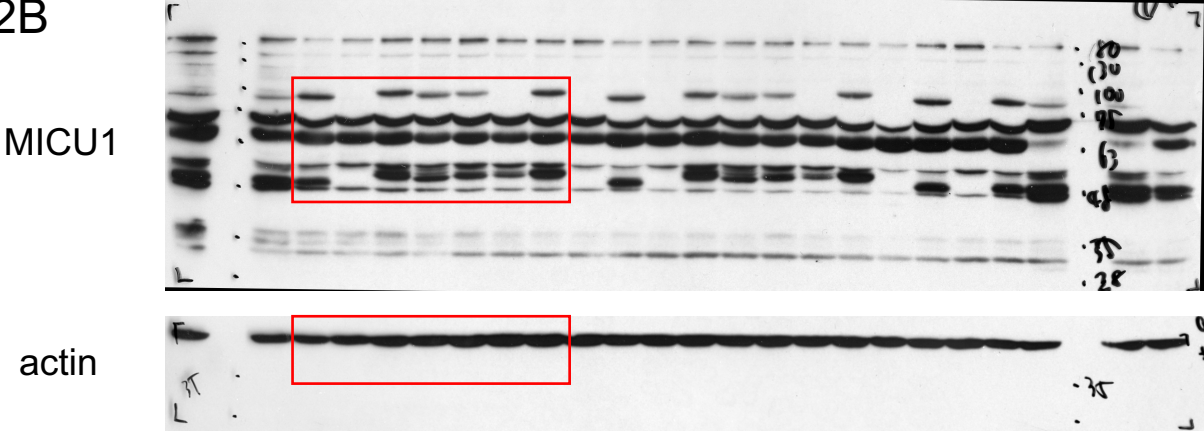

Supplement: EMBR-22-e51532-s003.pdf [file EMBR-22-e51532-s003.pdf]

Fig.1C

MICU1

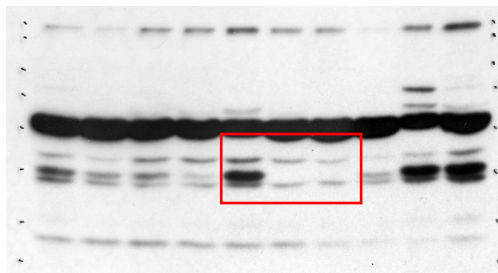

$\alpha$ -tubulin

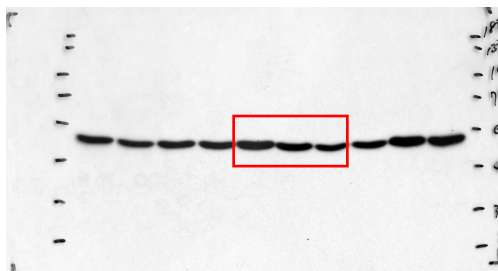

Supplement: EMBR-22-e51532-s008.pdf [file EMBR-22-e51532-s008.pdf]
